# Supplementary material
Source: PubMed Central journal article supplement (PMC5991545)
Supplement: CHEST60009-mmc1.pdf [file CHEST60009-mmc1.pdf]

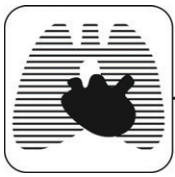

### Race and Sex Differences in Response to Endothelin Receptor Antagonists for Pulmonary Arterial Hypertension

Nicole B. Gabler, PhD, MHA; Benjamin French, PhD; Brian L. Strom, MD, MPH; Ziyue Liu, PhD; Harold I. Palevsky, MD, FCCP; Darren B. Taichman, MD, PhD, FCCP; Steven M. Kawut, MD, FCCP; and Scott D. Halpern, MD, PhD

e-Figure 1.

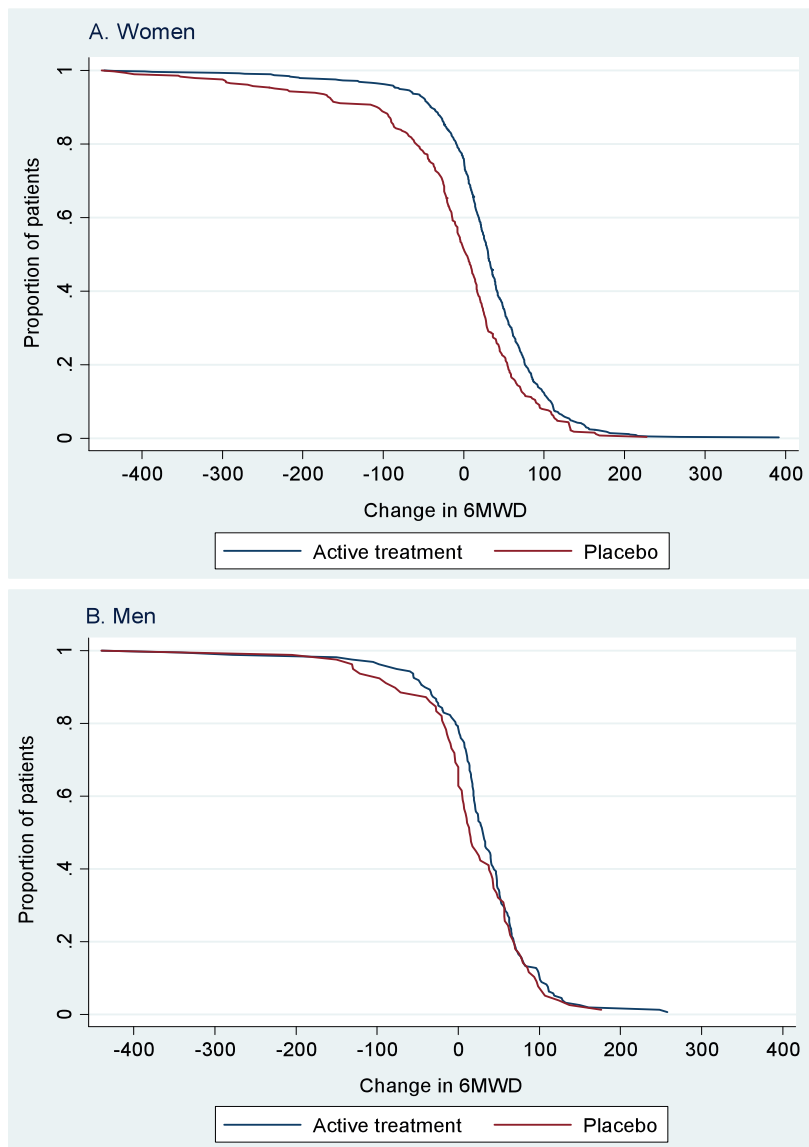

Online supplements are not copyedited prior to posting.

© 2012 American College of Chest Physicians. Reproduction of this article is prohibited without written permission from the American College of Chest Physicians (<http://www.chestpubs.org/site/misc/reprints.xhtml>). DOI: 10.1378/chest.11-0404



e-Figure 2.

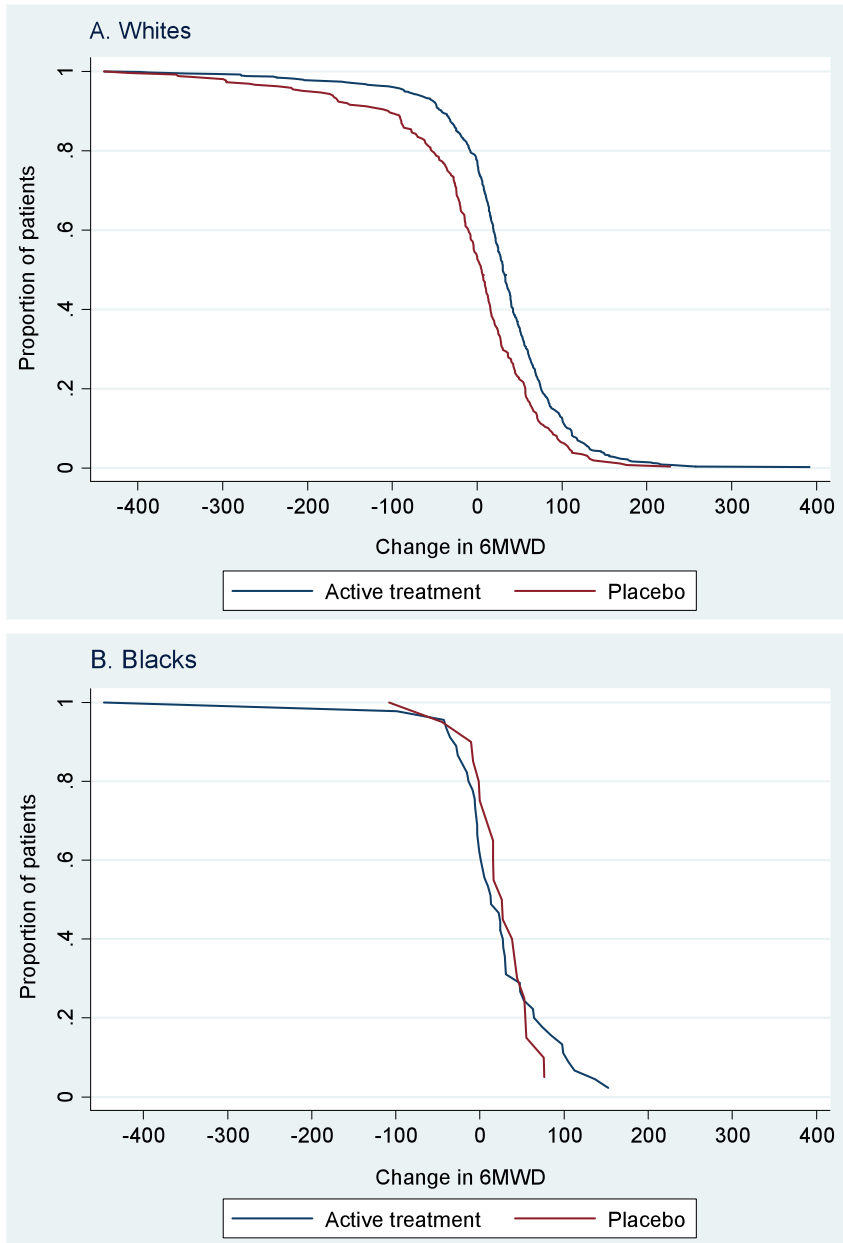

*Online supplements are not copyedited prior to posting.*

© 2012 American College of Chest Physicians. Reproduction of this article is prohibited without written permission from the American College of Chest Physicians (<http://www.chestpubs.org/site/misc/reprints.xhtml>). DOI: 10.1378/chest.11-0404

e-Table 1. Characteristics of study participants by sex

|                              | Women                |                    | Men                  |                   |
|------------------------------|----------------------|--------------------|----------------------|-------------------|
|                              | (n=894)              |                    | (n=236)              |                   |
|                              | Treatment<br>(n=615) | Placebo<br>(n=279) | Treatment<br>(n=158) | Placebo<br>(n=78) |
| Age, years                   | 50 (38-61)           | 49 (35-60)         | 51 (38-62)           | 50 (40-65)        |
| Race, n (%)                  |                      |                    |                      |                   |
| Black                        | 39 (6)               | 16 (6)             | 6 (4)                | 4 (5)             |
| White                        | 449 (73)             | 195 (70)           | 128 (81)             | 64 (82)           |
| Other                        | 127 (21)             | 68 (24)            | 24 (15)              | 10 (13)           |
| Height, cm                   | 160 (155-165)        | 160 (155-165)      | 173 (168-178)        | 175 (170-180)     |
| Weight, kg                   | 66 (58-77)           | 67 (58-81)         | 79 (68-90)           | 80 (70-93)        |
| BMI, kg/m <sup>2</sup>       | 26 (23-30)           | 26 (23-31)         | 26 (23-30)           | 27 (24-30)        |
| PAH Diagnosis, n (%)         |                      |                    |                      |                   |
| Idiopathic                   | 362 (59)             | 177 (64)           | 116 (73)             | 52 (67)           |
| Connective tissue disease    | 194 (32)             | 73 (26)            | 22 (14)              | 13 (17)           |
| HIV infection/Anorexigen Use | 13 (2)               | 6 (2)              | 10 (6)               | 5 (6)             |
| Congenital heart disease     | 44 (7)               | 22 (8)             | 10 (6)               | 8 (10)            |
| NYHA functional class, n (%) |                      |                    |                      |                   |
| I-II                         | 205 (33)             | 90 (32)            | 51 (32)              | 24 (31)           |
| III-IV                       | 409 (67)             | 189 (68)           | 107 (68)             | 54 (69)           |
| Baseline Hemodynamics        |                      |                    |                      |                   |
| Mean RAP, mmHg               | 7.0 (5.0-10.0)       | 7.0 (4.0-12.0)     | 9.0 (5.0-14.0)       | 8.0 (5.0-12.0)    |
| Mean PAP, mmHg               | 50 (40-60)           | 53 (42-63)         | 51 (42-62)           | 49 (41-55)        |
| Cardiac output, L/min        | 4.1 (3.3-5.1)        | 4.0 (3.3-5.2)      | 4.4 (3.6-5.6)        | 4.5 (3.8-5.4)     |

Online supplements are not copyedited prior to posting.

© 2012 American College of Chest Physicians.

Reproduction of this article is prohibited without written permission from the American College of Chest Physicians

(<http://www.chestpubs.org/site/misc/reprints.xhtml>). DOI: 10.1378/chest.11.0404

Downloaded from <http://www.chestpubs.org/> by Kimberly Francis on January 4, 2012

© 2012 American College of Chest Physicians

|                                     |                  |                  |                  |                  |
|-------------------------------------|------------------|------------------|------------------|------------------|
| Cardiac index, L/min/m <sup>2</sup> | 2.4 (1.9-2.9)    | 2.3 (1.9-2.9)    | 2.2 (1.9-2.8)    | 2.2 (1.8-2.7)    |
| PCWP, mmHg                          | 9.0 (7.0-12.0)   | 10.0 (7.0-12.0)  | 9.0 (7.0-12.0)   | 10.0 (6.0-12.0)  |
| PVR, Wood Units                     | 10.0 (6.9-14.9)  | 10.8 (7.0-15.7)  | 10.2 (6.2-13.9)  | 8.5 (6.5-12.1)   |
| Baseline laboratory values          |                  |                  |                  |                  |
| Albumin, g/dL                       | 4.2 (3.9-4.4)    | 4.2 (3.9-4.5)    | 4.3 (4.0-4.6)    | 4.2 (4.0-4.5)    |
| Creatinine, mg/dL                   | 0.80 (0.71-0.88) | 0.80 (0.62-0.88) | 0.97 (0.84-1.06) | 0.99 (0.81-1.15) |
| Hemoglobin, g/dL                    | 14.4 (13.2-15.5) | 14.1 (12.9-15.5) | 16.2 (14.9-17.0) | 15.7 (13.9-17.2) |
| Sodium, mEq/L                       | 140 (138-142)    | 140 (138-142)    | 140 (139-142)    | 141 (139-143)    |
| Warfarin use, n (%)                 | 364 (59)         | 182 (65)         | 102 (65)         | 48 (62)          |
| Baseline 6MWD, m                    | 355 (285-410)    | 358 (284-414)    | 378 (314-427)    | 393 (315-429)    |
| Study, n (%)                        |                  |                  |                  |                  |
| ARIES-1                             | 109 (18)         | 59 (21)          | 25 (16)          | 8 (10)           |
| ARIES-2                             | 99 (16)          | 44 (16)          | 28 (18)          | 21 (27)          |
| BREATHE-1                           | 114 (19)         | 54 (19)          | 31 (20)          | 15 (19)          |
| STRIDE-1                            | 94 (15)          | 47 (17)          | 24 (15)          | 13 (17)          |
| STRIDE-2                            | 145 (24)         | 47 (17)          | 40 (25)          | 15 (19)          |
| STRIDE-4                            | 54 (19)          | 28 (10)          | 10 (6)           | 6 (8)            |

HIV indicates human immunodeficiency virus; BMI, body mass index; ARIES, Ambrisentan in Pulmonary

Arterial Hypertension, Randomized, Double-Blind, Placebo-Controlled, Multicenter, Efficacy Studies;

BREATHE, Bosentan: Randomized Trial of Endothelin receptor Antagonist Therapy; STRIDE, Sitaxsentan To Relieve Impaired Exercise.

Data shown as median (IQR) unless otherwise indicated.

e-Table 2. Characteristics of study participants by race

|                                     | White                |                    | Black               |                   |
|-------------------------------------|----------------------|--------------------|---------------------|-------------------|
|                                     | (n=836)              |                    | (n=65)              |                   |
|                                     | Treatment<br>(n=577) | Placebo<br>(n=259) | Treatment<br>(n=45) | Placebo<br>(n=20) |
| Age, years                          | 54 (42-64)           | 52 (41-64)         | 45 (35-52)          | 43 (36-57)        |
| Sex (male), n (%)                   | 128 (22)             | 64 (25)            | 6 (13)              | 4 (20)            |
| Height, cm                          | 163 (158-170)        | 164 (158-170)      | 165 (160-170)       | 168 (160-173)     |
| Weight, kg                          | 70 (60-83)           | 72 (61-87)         | 77 (65-97)          | 83 (73-94)        |
| BMI, kg/m <sup>2</sup>              | 26 (23-31)           | 26 (23-31)         | 28 (24-35)          | 30 (26-33)        |
| PAH Diagnosis, n (%)                |                      |                    |                     |                   |
| Idiopathic                          | 351 (61)             | 167 (64)           | 22 (49)             | 12 (60)           |
| Connective tissue disease           | 171 (30)             | 64 (25)            | 17 (38)             | 5 (25)            |
| HIV infection/Anorexigen Use        | 16 (3)               | 8 (3)              | 5 (11)              | 2 (10)            |
| Congenital heart disease            | 37 (6)               | 20 (8)             | 1 (2)               | 1 (5)             |
| NYHA functional class, n (%)        |                      |                    |                     |                   |
| I-II                                | 185 (32)             | 74 (29)            | 9 (20)              | 9 (45)            |
| III-IV                              | 391 (68)             | 185 (71)           | 36 (80)             | 11 (55)           |
| Baseline Hemodynamics               |                      |                    |                     |                   |
| Mean RAP, mmHg                      | 7.5 (5.0-11.0)       | 7.0 (4.0-12.0)     | 7.3 (5.0-13.5)      | 8.0 (6.0-11.0)    |
| Mean PAP, mmHg                      | 50 (39-60)           | 51 (40-60)         | 46 (37-53)          | 47 (35-55)        |
| Cardiac output, L/min               | 4.2 (3.4-5.2)        | 4.2 (3.4-5.2)      | 4.3 (3.4-5.5)       | 4.6 (4.3-5.6)     |
| Cardiac index, L/min/m <sup>2</sup> | 2.3 (1.9-2.8)        | 2.3 (1.9-2.8)      | 2.3 (1.8-2.8)       | 2.4 (2.2-2.9)     |
| PCWP, mmHg                          | 9.0 (6.0-12.0)       | 9.0 (7.0-12.0)     | 9.0 (7.0-12.0)      | 10.5 (7.5-13.0)   |
| PVR, Wood Units                     | 10.0 (6.6-14.0)      | 10.0 (6.6-14.0)    | 8.7 (5.2-12.3)      | 8.2 (4.8-11.0)    |
| Baseline laboratory values          |                      |                    |                     |                   |

Online supplements are not copyedited prior to posting.

© 2012 American College of Chest Physicians.

Reproduction of this article is prohibited without written permission from the American College of Chest Physicians

(<http://www.chestpubs.org/site/misc/reprints.xhtml>). DOI: 10.1378/chest.11.0404

Downloaded from <http://www.chestpubs.org/> by Kimberly Francis on January 4, 2012

© 2012 American College of Chest Physicians

|                     |                  |                  |                  |                  |
|---------------------|------------------|------------------|------------------|------------------|
| Albumin, g/dL       | 4.2 (3.9-4.5)    | 4.2 (4.0-4.5)    | 4.1 (3.8-4.3)    | 3.9 (3.9-4.1)    |
| Creatinine, mg/dL   | 0.86 (0.71-0.97) | 0.86 (0.71-0.97) | 0.80 (0.71-0.97) | 0.76 (0.65-0.97) |
| Hemoglobin, g/dL    | 14.7 (13.5-15.9) | 14.5 (13.2-15.7) | 13.5 (12.8-15.1) | 12.7 (11.7-14.9) |
| Sodium, mEq/L       | 140 (138-142)    | 141 (139-142)    | 140 (138-141)    | 140 (138-141)    |
| Warfarin use, n (%) | 356 (62)         | 169 (65)         | 32 (71)          | 14 (70)          |
| Baseline 6MWD, m    | 363 (287-415)    | 367 (285-417)    | 355 (292-420)    | 351 (281-406)    |
| Study, n (%)        |                  |                  |                  |                  |
| ARIES-1             | 90 (16)          | 49 (19)          | 7 (16)           | 4 (20)           |
| ARIES-2             | 112 (19)         | 51 (20)          | 0 (0)            | 0 (0)            |
| BREATHE-1           | 112 (19)         | 59 (23)          | 12 (27)          | 1 (5)            |
| STRIDE-1            | 83 (14)          | 42 (16)          | 8 (18)           | 3 (15)           |
| STRIDE-2            | 150 (26)         | 46 (18)          | 18 (40)          | 9 (45)           |
| STRIDE-4            | 30 (5)           | 12 (5)           | 0 (0)            | 3 (15)           |

HIV indicates human immunodeficiency virus; BMI, body mass index; ARIES, Ambrisentan in Pulmonary

Arterial Hypertension, Randomized, Double-Blind, Placebo-Controlled, Multicenter, Efficacy Studies;

BREATHE, Bosentan: Randomized Trial of Endothelin receptor Antagonist Therapy; STRIDE, Sitaxsentan To Relieve Impaired Exercise.

Data shown as median (IQR) unless otherwise indicated.

e-Table 3. Sensitivity analysis results for change in 6MWD from baseline to 12-week follow-up by sex.

|                                                                  | Women<br>(n=894) | Men<br>(n=236) | Difference-in-difference<br>(95% CI) | p-value for<br>interaction |
|------------------------------------------------------------------|------------------|----------------|--------------------------------------|----------------------------|
| <i>Walk distance subsequent to clinical event coded as 50 m</i>  |                  |                |                                      |                            |
| <b>Base model*:</b>                                              |                  |                |                                      |                            |
| Treatment                                                        | 34.3             | 20.7           |                                      |                            |
| Placebo                                                          | -6.7             | 3.9            |                                      |                            |
| $\Delta$ (treatment-placebo)                                     | 41.0             | 16.8           | 24.2 (0, 48.4)                       | 0.05                       |
| <b>Partially adjusted model<sup>†</sup>:</b>                     |                  |                |                                      |                            |
| Treatment                                                        | 35.3             | 21.2           |                                      |                            |
| Placebo                                                          | -6.9             | 5.6            |                                      |                            |
| $\Delta$ (treatment-placebo)                                     | 42.2             | 15.6           | 26.6 (2.5, 50.7)                     | 0.03                       |
| <i>Walk distance subsequent to clinical event coded as 100 m</i> |                  |                |                                      |                            |
| <b>Base model*:</b>                                              |                  |                |                                      |                            |
| Treatment                                                        | 35.2             | 22.7           |                                      |                            |
| Placebo                                                          | -2.8             | 5.8            |                                      |                            |
| $\Delta$ (treatment-placebo)                                     | 38.0             | 16.9           | 21.1 (-1.4, 43.6)                    | 0.07                       |
| <b>Partially adjusted model<sup>†</sup>:</b>                     |                  |                |                                      |                            |
| Treatment                                                        | 35.0             | 22.1           |                                      |                            |
| Placebo                                                          | -4.2             | 6.5            |                                      |                            |
| $\Delta$ (treatment-placebo)                                     | 39.2             | 15.6           | 23.6 (1.2, 46.0)                     | 0.04                       |

Online supplements are not copyedited prior to posting.

© 2012 American College of Chest Physicians.

Reproduction of this article is prohibited without written permission from the American College of Chest Physicians

(<http://www.chestpubs.org/site/misc/reprints.xhtml>). DOI: 10.1378/chest.11.0404

Downloaded from <http://www.chestpubs.org/> by Kimberly Hendricks on January 4, 2012

© 2012 American College of Chest Physicians

---

*Walk distance subsequent to clinical event coded as 150 m*
**Base model\*:**

|                              |      |      |                   |      |
|------------------------------|------|------|-------------------|------|
| Treatment                    | 36.1 | 24.6 |                   |      |
| Placebo                      | 1.1  | 7.6  |                   |      |
| $\Delta$ (treatment-placebo) | 35.0 | 17.0 | 18.0 (-3.1, 39.1) | 0.10 |

**Partially adjusted model<sup>†</sup>:**

|                              |      |      |                   |       |
|------------------------------|------|------|-------------------|-------|
| Treatment                    | 34.8 | 23.0 |                   |       |
| Placebo                      | -1.5 | 7.5  |                   |       |
| $\Delta$ (treatment-placebo) | 36.3 | 15.5 | 20.8 (-0.1, 41.7) | 0.053 |

---



---

*Walk distance subsequent to clinical event coded as 275 m*
**Base model\*:**

|                              |      |      |                   |      |
|------------------------------|------|------|-------------------|------|
| Treatment                    | 38.3 | 29.5 |                   |      |
| Placebo                      | 11.0 | 12.2 |                   |      |
| $\Delta$ (treatment-placebo) | 27.3 | 17.3 | 10.0 (-9.1, 29.1) | 0.31 |

**Partially adjusted model<sup>†</sup>:**

|                              |      |      |                   |      |
|------------------------------|------|------|-------------------|------|
| Treatment                    | 34.1 | 25.3 |                   |      |
| Placebo                      | 5.4  | 9.7  |                   |      |
| $\Delta$ (treatment-placebo) | 28.7 | 15.6 | 13.1 (-5.6, 31.8) | 0.17 |

---

\* Adjusted for study, height, and baseline walk distance

<sup>†</sup> Adjusted for study, height, baseline walk distance, age, race, and diagnosis category

Online supplements are not copyedited prior to posting.

© 2012 American College of Chest Physicians.

Reproduction of this article is prohibited without written permission from the American College of Chest Physicians

(<http://www.chestpubs.org/site/misc/reprints.xhtml>). DOI: 10.1378/chest.11.0404

Downloaded from <http://www.chestpubs.org/> by Kimberly Francis on January 4, 2012

© 2012 American College of Chest Physicians



e-Table 4. Sensitivity analysis results for absolute distance walked at 12-week follow-up by sex.

|                                                                  | Women<br>(n=894) | Men<br>(n=236) | Difference-in-<br>difference (95% CI) | p-value for<br>interaction |
|------------------------------------------------------------------|------------------|----------------|---------------------------------------|----------------------------|
| <i>Walk distance subsequent to clinical event coded as 50 m</i>  |                  |                |                                       |                            |
| <b>Base model*:</b>                                              |                  |                |                                       |                            |
| Treatment                                                        | 382.5            | 379.8          |                                       |                            |
| Placebo                                                          | 341.5            | 363.2          |                                       |                            |
| $\Delta$ (treatment-placebo)                                     | 41.0             | 16.6           | 24.4 (-9.7, 58.5)                     | 0.16                       |
| <b>Partially adjusted model<sup>†</sup>:</b>                     |                  |                |                                       |                            |
| Treatment                                                        | 373.1            | 371.5          |                                       |                            |
| Placebo                                                          | 329.1            | 358.4          |                                       |                            |
| $\Delta$ (treatment-placebo)                                     | 44.0             | 13.1           | 30.9 (-2.0, 63.8)                     | 0.07                       |
| <b>Fully adjusted model<sup>‡</sup>:</b>                         |                  |                |                                       |                            |
| Treatment                                                        | 369.6            | 363.7          |                                       |                            |
| Placebo                                                          | 322.9            | 358.6          |                                       |                            |
| $\Delta$ (treatment-placebo)                                     | 46.7             | 5.1            | 41.6 (7.7, 75.5)                      | 0.02                       |
| <i>Walk distance subsequent to clinical event coded as 100 m</i> |                  |                |                                       |                            |
| <b>Base model*:</b>                                              |                  |                |                                       |                            |
| Treatment                                                        | 383.4            | 381.5          |                                       |                            |
| Placebo                                                          | 345.5            | 364.8          |                                       |                            |
| $\Delta$ (treatment-placebo)                                     | 37.9             | 16.7           | 21.2 (-11.5, 53.9)                    | 0.20                       |

Online supplements are not copyedited prior to posting.

© 2012 American College of Chest Physicians.

Reproduction of this article is prohibited without written permission from the American College of Chest Physicians

(<http://www.chestpubs.org/site/misc/reprints.xhtml>). DOI: 10.1378/chest.11.0404

Downloaded from <http://www.chestpubs.org/> by Kimberly Hendricks on January 4, 2012

© 2012 American College of Chest Physicians

**Partially adjusted model<sup>†</sup>:**

|                              |       |       |                   |      |
|------------------------------|-------|-------|-------------------|------|
| Treatment                    | 373.1 | 372.4 |                   |      |
| Placebo                      | 332.1 | 359.2 |                   |      |
| $\Delta$ (treatment-placebo) | 41.0  | 13.2  | 27.8 (-3.6, 59.2) | 0.08 |

**Fully adjusted model<sup>‡</sup>:**

|                              |       |       |                  |      |
|------------------------------|-------|-------|------------------|------|
| Treatment                    | 369.8 | 364.9 |                  |      |
| Placebo                      | 326.3 | 359.7 |                  |      |
| $\Delta$ (treatment-placebo) | 43.5  | 5.2   | 38.3 (6.1, 70.5) | 0.02 |

---

*Walk distance subsequent to clinical event coded as 150 m*

**Base model\*:**

|                              |       |       |                    |      |
|------------------------------|-------|-------|--------------------|------|
| Treatment                    | 384.3 | 383.3 |                    |      |
| Placebo                      | 349.4 | 366.4 |                    |      |
| $\Delta$ (treatment-placebo) | 34.9  | 16.9  | 18.0 (-13.4, 49.4) | 0.26 |

**Partially adjusted model<sup>†</sup>:**

|                              |       |       |                   |      |
|------------------------------|-------|-------|-------------------|------|
| Treatment                    | 373.0 | 373.3 |                   |      |
| Placebo                      | 335.1 | 360   |                   |      |
| $\Delta$ (treatment-placebo) | 37.9  | 13.3  | 24.6 (-5.4, 54.6) | 0.11 |

**Fully adjusted model<sup>‡</sup>:**

|                              |       |       |                  |      |
|------------------------------|-------|-------|------------------|------|
| Treatment                    | 370.1 | 366.2 |                  |      |
| Placebo                      | 329.7 | 360.9 |                  |      |
| $\Delta$ (treatment-placebo) | 40.4  | 5.3   | 35.1 (4.3, 65.9) | 0.03 |

---

Online supplements are not copyedited prior to posting.

© 2012 American College of Chest Physicians.

Reproduction of this article is prohibited without written permission from the American College of Chest Physicians

(<http://www.chestpubs.org/site/misc/reprints.xhtml>). DOI: 10.1378/chest.11.0404

Downloaded from <http://www.chestpubs.org/> by Kimberly Hendricks on January 4, 2012

© 2012 American College of Chest Physicians

*Walk distance subsequent to clinical event coded as 275 m*

**Base model\*:**

|                              |       |       |                    |      |
|------------------------------|-------|-------|--------------------|------|
| Treatment                    | 386.5 | 387.7 |                    |      |
| Placebo                      | 359.3 | 370.6 |                    |      |
| $\Delta$ (treatment-placebo) | 27.2  | 17.1  | 10.1 (-19.0, 39.2) | 0.50 |

**Partially adjusted model<sup>†</sup>:**

|                              |       |       |                    |      |
|------------------------------|-------|-------|--------------------|------|
| Treatment                    | 373.0 | 375.5 |                    |      |
| Placebo                      | 342.7 | 362.1 |                    |      |
| $\Delta$ (treatment-placebo) | 30.3  | 13.4  | 16.9 (-10.7, 44.5) | 0.23 |

**Fully adjusted model<sup>‡</sup>:**

|                              |       |       |                   |      |
|------------------------------|-------|-------|-------------------|------|
| Treatment                    | 370.7 | 369.3 |                   |      |
| Placebo                      | 338.3 | 363.7 |                   |      |
| $\Delta$ (treatment-placebo) | 32.4  | 5.6   | 26.8 (-1.5, 55.1) | 0.06 |

---

\* Adjusted for study and height

<sup>†</sup> Adjusted for study, height, age, race, and diagnosis category

<sup>‡</sup> Adjusted for study, height, age, race, diagnosis category, cardiac index, and pulmonary capillary wedge pressure

Online supplements are not copyedited prior to posting.

© 2012 American College of Chest Physicians.

Reproduction of this article is prohibited without written permission from the American College of Chest Physicians

(<http://www.chestpubs.org/site/misc/reprints.xhtml>). DOI: 10.1378/chest.11.0404

Downloaded from <http://www.chestpubs.org/> by Kimberly Francis on January 4, 2012

© 2012 American College of Chest Physicians

e-Table 5. Change in 6MWD from baseline to 12-week follow-up by sex for patients with idiopathic PAH

|                                              | Women<br>(n=539) | Men<br>(n=168) | Difference-in-difference<br>(95% CI) | p-value for<br>interaction |
|----------------------------------------------|------------------|----------------|--------------------------------------|----------------------------|
| <b>Base model*:</b>                          |                  |                |                                      |                            |
| Treatment                                    | 40.3             | 20.5           |                                      |                            |
| Placebo                                      | -15.4            | -13.4          |                                      |                            |
| $\Delta$ (treatment-placebo)                 | 55.7             | 33.9           | 21.8 (-11.4, 55.0)                   | 0.20                       |
| <b>Partially adjusted model<sup>†</sup>:</b> |                  |                |                                      |                            |
| Treatment                                    | 35.0             | 18.8           |                                      |                            |
| Placebo                                      | -20.4            | -13.8          |                                      |                            |
| $\Delta$ (treatment-placebo)                 | 55.4             | 32.6           | 22.8 (-10.4, 56.0)                   | 0.18                       |

\* Adjusted for study, height, and baseline walk distance

<sup>†</sup> Adjusted for study, height, baseline walk distance, age, and race

e-Table 6. Sensitivity analysis results for change in 6MWD from baseline to 12-week follow-up by race.

|                                                                  | White<br>(n=894) | Black<br>(n=65) | Difference-in-difference<br>(95% CI) | p-value for<br>interaction |
|------------------------------------------------------------------|------------------|-----------------|--------------------------------------|----------------------------|
| <i>Walk distance subsequent to clinical event coded as 50 m</i>  |                  |                 |                                      |                            |
| <b>Base model*:</b>                                              |                  |                 |                                      |                            |
| Treatment                                                        | 32.9             | 16.0            |                                      |                            |
| Placebo                                                          | -6.1             | 18.0            |                                      |                            |
| $\Delta$ (treatment-placebo)                                     | 39.0             | -2.0            | 41.0 (-3.0, 85.0)                    | 0.07                       |
| <b>Partially adjusted model<sup>†</sup>:</b>                     |                  |                 |                                      |                            |
| Treatment                                                        | 33.4             | 13.0            |                                      |                            |
| Placebo                                                          | -6.3             | 12.8            |                                      |                            |
| $\Delta$ (treatment-placebo)                                     | 39.7             | 0.02            | 39.5 (-4.2, 83.2)                    | 0.08                       |
| <i>Walk distance subsequent to clinical event coded as 100 m</i> |                  |                 |                                      |                            |
| <b>Base model*:</b>                                              |                  |                 |                                      |                            |
| Treatment                                                        | 34.1             | 17.7            |                                      |                            |
| Placebo                                                          | -2.5             | 18.1            |                                      |                            |
| $\Delta$ (treatment-placebo)                                     | 36.6             | -0.4            | 37.0 (-4.1, 78.1)                    | 0.08                       |
| <b>Partially adjusted model<sup>†</sup>:</b>                     |                  |                 |                                      |                            |
| Treatment                                                        | 34.4             | 13.9            |                                      |                            |
| Placebo                                                          | -2.9             | 12.2            |                                      |                            |
| $\Delta$ (treatment-placebo)                                     | 37.3             | 1.7             | 35.6 (-5.0, 76.2)                    | 0.09                       |

Online supplements are not copyedited prior to posting.

© 2012 American College of Chest Physicians.

Reproduction of this article is prohibited without written permission from the American College of Chest Physicians

(<http://www.chestpubs.org/site/misc/reprints.xhtml>). DOI: 10.1378/chest.11.0404

Downloaded from <http://www.chestpubs.org/> by Kimberly Francis on January 4, 2012

© 2012 American College of Chest Physicians

---

*Walk distance subsequent to clinical event coded as 150 m*

**Base model\*:**

|                              |      |      |                   |      |
|------------------------------|------|------|-------------------|------|
| Treatment                    | 35.3 | 19.3 |                   |      |
| Placebo                      | 1.2  | 18.3 |                   |      |
| $\Delta$ (treatment-placebo) | 34.1 | 1.0  | 33.1 (-5.5, 71.7) | 0.09 |

**Partially adjusted model<sup>†</sup>:**

|                              |      |      |                   |      |
|------------------------------|------|------|-------------------|------|
| Treatment                    | 35.3 | 14.9 |                   |      |
| Placebo                      | 1.0  | 11.6 |                   |      |
| $\Delta$ (treatment-placebo) | 34.3 | 3.3  | 31.0 (-7.1, 69.1) | 0.11 |

---

*Walk distance subsequent to clinical event coded as 275 m*

**Base model\*:**

|                              |      |      |                    |      |
|------------------------------|------|------|--------------------|------|
| Treatment                    | 38.2 | 23.4 |                    |      |
| Placebo                      | 10.3 | 18.6 |                    |      |
| $\Delta$ (treatment-placebo) | 27.9 | 4.8  | 23.1 (-12.2, 58.4) | 0.20 |

**Partially adjusted model<sup>†</sup>:**

|                              |      |      |                    |      |
|------------------------------|------|------|--------------------|------|
| Treatment                    | 37.7 | 17.2 |                    |      |
| Placebo                      | 9.2  | 10.0 |                    |      |
| $\Delta$ (treatment-placebo) | 28.5 | 7.2  | 21.3 (-13.2, 55.8) | 0.23 |

---

\* Adjusted for study, height, and baseline walk distance

<sup>†</sup> Adjusted for study, height, baseline walk distance, age, sex, and diagnosis category

Online supplements are not copyedited prior to posting.

© 2012 American College of Chest Physicians.

Reproduction of this article is prohibited without written permission from the American College of Chest Physicians

(<http://www.chestpubs.org/site/misc/reprints.xhtml>). DOI: 10.1378/chest.11.0404

Downloaded from <http://www.chestpubs.org/> by Kimberly Francis on January 4, 2012

© 2012 American College of Chest Physicians

e-Table 7. Sensitivity analysis results for absolute distance walked at 12-week follow-up by race.

|                                                                  | White<br>(n=836) | Black<br>(n=65) | Difference-in-difference<br>(95% CI) | p-value for<br>interaction |
|------------------------------------------------------------------|------------------|-----------------|--------------------------------------|----------------------------|
| <i>Walk distance subsequent to clinical event coded as 50 m</i>  |                  |                 |                                      |                            |
| <b>Base model*:</b>                                              |                  |                 |                                      |                            |
| Treatment                                                        | 385.2            | 369.5           |                                      |                            |
| Placebo                                                          | 346.1            | 357.3           |                                      |                            |
| $\Delta$ (treatment-placebo)                                     | 39.1             | 12.2            | 26.9 (-36.3, 90.1)                   | 0.41                       |
| <b>Partially adjusted model<sup>†</sup>:</b>                     |                  |                 |                                      |                            |
| Treatment                                                        | 387.8            | 361.0           |                                      |                            |
| Placebo                                                          | 347.5            | 344.7           |                                      |                            |
| $\Delta$ (treatment-placebo)                                     | 40.3             | 16.3            | 24.0 (-36.4, 84.4)                   | 0.44                       |
| <b>Fully adjusted model<sup>‡</sup>:</b>                         |                  |                 |                                      |                            |
| Treatment                                                        | 399.0            | 379.7           |                                      |                            |
| Placebo                                                          | 359.9            | 351.5           |                                      |                            |
| $\Delta$ (treatment-placebo)                                     | 39.1             | 28.2            | 10.9 (-47.7, 69.5)                   | 0.72                       |
| <i>Walk distance subsequent to clinical event coded as 100 m</i> |                  |                 |                                      |                            |
| <b>Base model*:</b>                                              |                  |                 |                                      |                            |
| Treatment                                                        | 386.3            | 371.1           |                                      |                            |
| Placebo                                                          | 349.7            | 357.6           |                                      |                            |
| $\Delta$ (treatment-placebo)                                     | 36.6             | 13.5            | 23.1 (-37.4, 83.6)                   | 0.45                       |

Online supplements are not copyedited prior to posting.

© 2012 American College of Chest Physicians.

Reproduction of this article is prohibited without written permission from the American College of Chest Physicians

(<http://www.chestpubs.org/site/misc/reprints.xhtml>). DOI: 10.1378/chest.11.0404  
Downloaded from <http://www.chestpubs.org/> by Kimberly Hendrick on January 4, 2012

© 2012 American College of Chest Physicians

**Partially adjusted model<sup>†</sup>:**

|                              |       |       |                    |      |
|------------------------------|-------|-------|--------------------|------|
| Treatment                    | 388.6 | 362.0 |                    |      |
| Placebo                      | 350.8 | 344.5 |                    |      |
| $\Delta$ (treatment-placebo) | 37.8  | 17.5  | 20.3 (-37.2, 77.8) | 0.49 |

**Fully adjusted model<sup>‡</sup>:**

|                              |       |       |                   |      |
|------------------------------|-------|-------|-------------------|------|
| Treatment                    | 399.4 | 379.9 |                   |      |
| Placebo                      | 362.8 | 351.0 |                   |      |
| $\Delta$ (treatment-placebo) | 36.6  | 28.9  | 7.7 (-48.0, 63.4) | 0.79 |

---

*Walk distance subsequent to clinical event coded as 150 m*

**Base model\*:**

|                              |       |       |                    |      |
|------------------------------|-------|-------|--------------------|------|
| Treatment                    | 387.4 | 372.6 |                    |      |
| Placebo                      | 353.3 | 357.9 |                    |      |
| $\Delta$ (treatment-placebo) | 34.1  | 14.7  | 19.4 (-38.7, 77.5) | 0.51 |

**Partially adjusted model<sup>†</sup>:**

|                              |       |       |                    |      |
|------------------------------|-------|-------|--------------------|------|
| Treatment                    | 389.4 | 363.0 |                    |      |
| Placebo                      | 354.1 | 344.3 |                    |      |
| $\Delta$ (treatment-placebo) | 35.3  | 18.7  | 16.6 (-38.4, 71.6) | 0.55 |

**Fully adjusted model<sup>‡</sup>:**

|                              |       |       |                   |      |
|------------------------------|-------|-------|-------------------|------|
| Treatment                    | 399.8 | 380.2 |                   |      |
| Placebo                      | 365.6 | 350.5 |                   |      |
| $\Delta$ (treatment-placebo) | 34.2  | 29.7  | 4.5 (-48.8, 57.8) | 0.87 |

---

Online supplements are not copyedited prior to posting.

© 2012 American College of Chest Physicians.

Reproduction of this article is prohibited without written permission from the American College of Chest Physicians

(<http://www.chestpubs.org/site/misc/reprints.xhtml>). DOI: 10.1378/chest.11.0104

Downloaded from <http://www.chestpubs.org/> by Kimberly Hendrick on January 4, 2012

© 2012 American College of Chest Physicians



---

*Walk distance subsequent to clinical event coded as 275 m*

**Base model\*:**

|                              |       |       |                    |      |
|------------------------------|-------|-------|--------------------|------|
| Treatment                    | 390.2 | 376.4 |                    |      |
| Placebo                      | 362.2 | 358.8 |                    |      |
| $\Delta$ (treatment-placebo) | 28.0  | 17.6  | 10.4 (-43.7, 64.5) | 0.71 |

**Partially adjusted model<sup>†</sup>:**

|                              |       |       |                   |      |
|------------------------------|-------|-------|-------------------|------|
| Treatment                    | 391.5 | 365.4 |                   |      |
| Placebo                      | 362.4 | 343.8 |                   |      |
| $\Delta$ (treatment-placebo) | 29.1  | 21.6  | 7.5 (-43.1, 58.1) | 0.77 |

**Fully adjusted model<sup>‡</sup>:**

|                              |       |       |                    |      |
|------------------------------|-------|-------|--------------------|------|
| Treatment                    | 400.7 | 380.8 |                    |      |
| Placebo                      | 372.6 | 349.4 |                    |      |
| $\Delta$ (treatment-placebo) | 28.1  | 31.4  | -3.3 (-52.4, 45.8) | 0.90 |

---

\* Adjusted for study and height

† Adjusted for study, height, age, sex, and diagnosis category

‡ Adjusted for study, height, age, sex, diagnosis category, and New York Heart Association class

Online supplements are not copyedited prior to posting.

© 2012 American College of Chest Physicians.

Reproduction of this article is prohibited without written permission from the American College of Chest Physicians

(<http://www.chestpubs.org/site/misc/reprints.xhtml>). DOI: 10.1378/chest.11.0404

Downloaded from <http://www.chestpubs.org/> by Kimberly Francis on January 4, 2012

© 2012 American College of Chest Physicians

e-Table 8. Change in 6MWD from baseline to 12-week follow-up by race for patients with idiopathic PAH.

|                                              | White<br>(n=518) | Black<br>(n=34) | Difference-in-difference<br>(95% CI) | p-value for<br>interaction |
|----------------------------------------------|------------------|-----------------|--------------------------------------|----------------------------|
| <b>Base model*:</b>                          |                  |                 |                                      |                            |
| Treatment                                    | 38.9             | 14.4            |                                      |                            |
| Placebo                                      | -16.6            | 20.6            |                                      |                            |
| $\Delta$ (treatment-placebo)                 | 55.5             | -6.2            | 61.7 (-3.8, 127.2)                   | 0.06                       |
| <b>Partially adjusted model<sup>†</sup>:</b> |                  |                 |                                      |                            |
| Treatment                                    | 37.7             | 6.4             |                                      |                            |
| Placebo                                      | -17.3            | 16.7            |                                      |                            |
| $\Delta$ (treatment-placebo)                 | 55.0             | -10.3           | 65.3 (0.5, 130.6)                    | 0.05                       |

\* Adjusted for study, height, and baseline walk distance

<sup>†</sup> Adjusted for study, height, baseline walk distance, age, and sex.

e-Table 9. Regression output for model examining change in 6MWD from baseline to 12-week follow-up by sex.

|                           | Estimate | Standard Error | t-value | p-value |
|---------------------------|----------|----------------|---------|---------|
| Intercept                 | -78.73   | 61.11          | -1.29   | 0.20    |
| Treatment                 | 45.25    | 6.22           | 7.28    | <0.001  |
| Sex (male)                | 14.41    | 21.21          | 1.18    | 0.24    |
| Study                     |          |                |         | 0.009   |
| ARIES-1                   | -16.01   | 11.05          | -1.45   | 0.14    |
| ARIES-2                   | -25.25   | 11.20          | -2.25   | 0.02    |
| BREATHE -1                | -17.86   | 11.04          | -1.62   | 0.11    |
| STRIDE-1                  | -38.80   | 11.32          | -3.43   | 0.001   |
| STRIDE-2                  | -30.15   | 10.92          | -2.76   | 0.006   |
| Height                    | 0.92     | 0.36           | 2.53    | 0.01    |
| Baseline walk distance    | -0.08    | 0.03           | -2.46   | 0.01    |
| Age                       | -0.55    | 0.20           | -2.82   | 0.005   |
| Race                      |          |                |         | 0.50    |
| White                     | -4.32    | 14.79          | -0.29   | 0.77    |
| Black                     | -11.91   | 18.04          | -0.66   | 0.51    |
| Hispanic                  | -14.86   | 15.81          | -0.94   | 0.35    |
| Diagnosis                 |          |                |         | 0.09    |
| Connective tissue disease | -11.81   | 6.10           | -1.93   | 0.05    |
| Congenital heart disease  | 10.96    | 10.58          | 1.04    | 0.30    |
| HIV/Anorexigen Use        | 6.60     | 15.39          | 0.43    | 0.67    |

Online supplements are not copyedited prior to posting.

© 2012 American College of Chest Physicians.

Reproduction of this article is prohibited without written permission from the American College of Chest Physicians

(<http://www.chestpubs.org/site/misc/reprints.xhtml>). DOI: 10.1378/chest.11.0104

Downloaded from <http://www.chestpubs.org/> by Kimberly Flannery on January 4, 2012

© 2012 American College of Chest Physicians

|               |        |       |       |      |
|---------------|--------|-------|-------|------|
| Sex*Treatment | -29.66 | 13.27 | -2.24 | 0.03 |
|---------------|--------|-------|-------|------|

---

Online supplements are not copyedited prior to posting.

© 2012 American College of Chest Physicians.

Reproduction of this article is prohibited without written permission from the American College of Chest Physicians

(<http://www.chestpubs.org/site/misc/reprints.xhtml>). DOI: 10.1378/chest.11.0404

Downloaded from <http://chestpubs.org> by Kimberly Hendricks on January 4, 2012

© 2012 American College of Chest Physicians

e-Table 10. Regression output for model examining absolute distance walked at 12 week follow-up by sex.

|                           | Estimate | Standard Error | t-value | p-value |
|---------------------------|----------|----------------|---------|---------|
| Intercept                 | 135.23   | 84.40          | 1.60    | 0.11    |
| Treatment                 | 49.92    | 8.49           | 5.88    | <0.001  |
| Sex (male)                | 38.02    | 16.61          | 2.29    | 0.02    |
| Study                     |          |                |         | 0.03    |
| ARIES-1                   | -4.78    | 15.26          | -0.31   | 0.75    |
| ARIES-2                   | -12.98   | 15.43          | -0.84   | 0.40    |
| BREATHE -1                | -14.17   | 15.28          | -0.92   | 0.35    |
| STRIDE-1                  | 18.15    | 15.30          | 1.19    | 0.24    |
| STRIDE-2                  | -19.94   | 15.13          | -1.32   | 0.19    |
| Height                    | 1.48     | 0.50           | 2.95    | 0.003   |
| Age                       | -1.90    | 0.26           | -7.28   | <0.001  |
| Race                      |          |                |         | 0.04    |
| White                     | 27.89    | 19.96          | 1.40    | 0.16    |
| Black                     | 11.69    | 24.38          | 0.48    | 0.63    |
| Hispanic                  | -0.55    | 21.35          | -0.03   | 0.98    |
| Diagnosis                 |          |                |         | 0.01    |
| Connective tissue disease | -27.24   | 8.37           | -3.25   | 0.001   |
| Congenital heart disease  | 2.70     | 14.91          | 0.18    | 0.86    |
| HIV/Anorexigen Use        | -6.78    | 21.88          | -0.31   | 0.76    |
| Baseline cardiac index    | 16.89    | 4.04           | 4.18    | <0.001  |

Online supplements are not copyedited prior to posting.

© 2012 American College of Chest Physicians.

Reproduction of this article is prohibited without written permission from the American College of Chest Physicians

(<http://www.chestpubs.org/site/misc/reprints.xhtml>). DOI: 10.1378/chest.11.0404

Downloaded from <http://www.chestpubs.org/> by Kimberly Hendricks on January 4, 2012

© 2012 American College of Chest Physicians

|               |        |       |       |      |
|---------------|--------|-------|-------|------|
| Baseline PCWP | -0.12  | 0.97  | -0.12 | 0.91 |
| Sex*Treatment | -44.93 | 18.22 | -2.47 | 0.01 |

---

Online supplements are not copyedited prior to posting.

© 2012 American College of Chest Physicians.

Reproduction of this article is prohibited without written permission from the American College of Chest Physicians

(<http://www.chestpubs.org/site/misc/reprints.xhtml>). DOI: 10.1378/chest.11.0404

Downloaded from <http://chestpubs.aacp.org> by Kimberly Hendricks on January 4, 2012

© 2012 American College of Chest Physicians

e-Table 11. Regression output for model examining change in 6MWD from baseline to 12-week follow-up by race.

|                           | Estimate | Standard Error | t-value | p-value |
|---------------------------|----------|----------------|---------|---------|
| Intercept                 | -94.22   | 67.50          | -1.40   | 0.16    |
| Treatment                 | 42.20    | 6.29           | 6.71    | <0.001  |
| Race (black)              | 23.17    | 20.49          | 1.13    | 0.26    |
| Study                     |          |                |         | 0.06    |
| ARIES-1                   | -7.19    | 14.61          | -0.49   | 0.62    |
| ARIES-2                   | -20.57   | 14.44          | -1.42   | 0.15    |
| BREATHE -1                | -5.55    | 14.35          | -0.38   | 0.70    |
| STRIDE-1                  | -29.74   | 14.83          | -2.01   | 0.04    |
| STRIDE-2                  | -22.63   | 14.02          | -1.61   | 0.11    |
| Height                    | 0.92     | 0.40           | 2.31    | 0.02    |
| Baseline walk distance    | -0.06    | 0.03           | -1.70   | 0.09    |
| Age                       | -0.54    | 0.20           | -2.56   | 0.01    |
| Sex (male)                | -6.59    | 8.60           | -0.77   | 0.44    |
| Diagnosis                 |          |                |         | 0.16    |
| Connective tissue disease | -13.27   | 6.61           | -2.01   | 0.04    |
| Congenital heart disease  | 9.65     | 12.24          | 0.79    | 0.43    |
| HIV/Anorexigen Use        | 1.37     | 15.97          | 0.09    | 0.93    |
| Race*Treatment            | -43.62   | 24.04          | -1.81   | 0.07    |

Online supplements are not copyedited prior to posting.

© 2012 American College of Chest Physicians.

Reproduction of this article is prohibited without written permission from the American College of Chest Physicians

(<http://www.chestpubs.org/site/misc/reprints.xhtml>). DOI: 10.1378/chest.11.0404

Downloaded from <http://www.chestpubs.org/> by Kimberly Hendricks on January 4, 2012

© 2012 American College of Chest Physicians

e-Table 12. Regression output for model examining absolute distance walked at 12-week follow-up by race.

|                           | Estimate | Standard Error | t-value | p-value |
|---------------------------|----------|----------------|---------|---------|
| Intercept                 | 295.55   | 88.23          | 3.35    | 0.001   |
| Treatment                 | 41.54    | 8.27           | 5.02    | <0.001  |
| Race (black)              | -5.21    | 26.77          | -0.19   | 0.85    |
| Study                     |          |                |         | 0.002   |
| ARIES-1                   | -6.90    | 19.23          | -0.36   | 0.72    |
| ARIES-2                   | -20.93   | 18.94          | -1.10   | 0.27    |
| BREATHE -1                | 10.73    | 19.31          | 0.56    | 0.58    |
| STRIDE-1                  | 20.46    | 19.33          | 1.06    | 0.29    |
| STRIDE-2                  | -23.63   | 18.42          | -1.28   | 0.20    |
| Height                    | 1.18     | 0.53           | 2.25    | 0.02    |
| Age                       | -1.87    | 0.26           | -7.00   | <0.001  |
| Sex (male)                | 12.74    | 11.34          | 1.12    | 0.26    |
| Diagnosis                 |          |                |         | 0.01    |
| Connective tissue disease | -27.82   | 8.67           | -3.21   | 0.001   |
| Congenital heart disease  | 7.90     | 16.06          | 0.49    | 0.62    |
| HIV/Anorexigen Use        | -4.75    | 21.12          | -0.22   | 0.82    |
| NYHA class (III/IV)       | -65.81   | 8.55           | -7.69   | <0.001  |
| Race*Treatment            | -13.99   | 31.53          | -0.44   | 0.66    |

Online supplements are not copyedited prior to posting.

© 2012 American College of Chest Physicians.

Reproduction of this article is prohibited without written permission from the American College of Chest Physicians

(<http://www.chestpubs.org/site/misc/reprints.xhtml>). DOI: 10.1378/chest.11.0404

Downloaded from <http://www.chestpubs.org/> by Kimberly Hendricks on January 4, 2012

© 2012 American College of Chest Physicians
